# Supplementary material for: Distinct Effects of Seed Coat and Flower Colors on Metabolite Contents and Antioxidant Activities in Safflower Seeds
Source: MDPI journal article supplement (doi:10.3390/antiox12040961), 2023-04-19
Supplement: s1 [file s1]

**Table S1.** Variations in total oil content, fatty acid profile, phytochemical contents, and antioxidant activities according to seed coat color.

| Parameter              | Values | Dark brown          | Brown                | Light brown          | Mix                  | White               | P-Value |
|------------------------|--------|---------------------|----------------------|----------------------|----------------------|---------------------|---------|
| TO (%)                 | Range  | 15.71–21.56         | 10.15–38.37          | 10.58–34.67          | 12.60–30.69          | 15.85–27.45         | NS      |
|                        | Mean   | 19.59 <sup>a</sup>  | 19.79 <sup>a</sup>   | 20.69 <sup>a</sup>   | 19.70 <sup>a</sup>   | 21.54 <sup>a</sup>  |         |
|                        | CV (%) | 17.15               | 31.83                | 22.14                | 19.70                | 13.42               |         |
| PA (%)                 | Range  | 5.93–7.19           | 5.38–7.79            | 5.13–8.38            | 5.42–7.35            | 5.15–6.77           | ***     |
|                        | Mean   | 6.69 <sup>a</sup>   | 6.41 <sup>a</sup>    | 6.34 <sup>ab</sup>   | 6.32 <sup>ab</sup>   | 5.90 <sup>b</sup>   |         |
|                        | CV (%) | 10.01               | 9.98                 | 9.15                 | 7.59                 | 4.75                |         |
| SA (%)                 | Range  | 2.32–2.89           | 2.19–3.19            | 1.87–5.31            | 2.04–3.74            | 2.11–3.71           | NS      |
|                        | Mean   | 2.60 <sup>a</sup>   | 2.56 <sup>a</sup>    | 2.57 <sup>a</sup>    | 2.56 <sup>a</sup>    | 2.62 <sup>a</sup>   |         |
|                        | CV (%) | 11.15               | 10.94                | 15.18                | 12.50                | 14.89               |         |
| OA (%)                 | Range  | 11.16–13.43         | 9.64–16.46           | 8.35–25.55           | 8.09–21.83           | 9.05–13.98          | NS      |
|                        | Mean   | 12.58 <sup>a</sup>  | 12.34 <sup>a</sup>   | 12.17 <sup>a</sup>   | 12.16 <sup>a</sup>   | 11.35 <sup>a</sup>  |         |
|                        | CV (%) | 9.86                | 13.70                | 18.24                | 15.87                | 9.60                |         |
| LA (%)                 | Range  | 76.70–79.27         | 73.72–81.17          | 65.66–83.47          | 70.23–84.19          | 76.63–82.56         | *       |
|                        | Mean   | 78.09 <sup>a</sup>  | 78.56 <sup>a</sup>   | 78.82 <sup>a</sup>   | 78.87 <sup>a</sup>   | 80.08 <sup>a</sup>  |         |
|                        | CV (%) | 1.66                | 2.48                 | 3.26                 | 2.70                 | 1.56                |         |
| LNA (%)                | Range  | 0.04–0.10           | 0.07–0.21            | 0.00–0.21            | 0.04–0.19            | 0.00–0.16           | ***     |
|                        | Mean   | 0.07 <sup>c</sup>   | 0.14 <sup>a</sup>    | 0.10 <sup>ab</sup>   | 0.11 <sup>a</sup>    | 0.07 <sup>bc</sup>  |         |
|                        | CV (%) | 42.86               | 28.57                | 40.00                | 27.27                | 57.14               |         |
| TSFA (%)               | Range  | 8.52–9.83           | 7.68–10.30           | 7.21–11.09           | 7.53–10.19           | 7.39–9.51           | **      |
|                        | Mean   | 9.29 <sup>a</sup>   | 8.98 <sup>ab</sup>   | 8.91 <sup>ab</sup>   | 8.87 <sup>ab</sup>   | 8.52 <sup>b</sup>   |         |
|                        | CV (%) | 7.32                | 8.02                 | 7.86                 | 6.65                 | 5.63                |         |
| TUFA (%)               | Range  | 90.19–91.51         | 89.70–92.37          | 88.91–92.79          | 89.85–92.47          | 90.49–92.68         | **      |
|                        | Mean   | 90.74 <sup>b</sup>  | 91.03 <sup>ab</sup>  | 91.09 <sup>ab</sup>  | 91.14 <sup>ab</sup>  | 91.5 <sup>a</sup>   |         |
|                        | CV (%) | 0.76                | 0.80                 | 0.77                 | 0.65                 | 0.52                |         |
| US                     | Range  | 9.18–10.74          | 8.71–12.03           | 8.01–12.86           | 8.81–12.28           | 9.52–12.55          | *       |
|                        | Mean   | 9.81 <sup>b</sup>   | 10.21 <sup>ab</sup>  | 10.29 <sup>ab</sup>  | 10.32 <sup>ab</sup>  | 10.78 <sup>a</sup>  |         |
|                        | CV (%) | 8.36                | 8.91                 | 8.55                 | 7.46                 | 6.12                |         |
| CS (mg/g)              | Range  | 0.20–3.32           | 0.69–34.96           | 0.76–42.82           | 0.51–62.01           | 4.52–49.33          | ***     |
|                        | Mean   | 1.41 <sup>c</sup>   | 9.66 <sup>bc</sup>   | 15.69 <sup>ab</sup>  | 14.48 <sup>ab</sup>  | 21.21 <sup>a</sup>  |         |
|                        | CV (%) | 119.15              | 89.44                | 60.74                | 74.45                | 54.13               |         |
| FS (mg/g)              | Range  | 0.51–3.33           | 0.04–15.60           | 1.29–36.74           | 0.61–42.80           | 3.88–34.31          | ***     |
|                        | Mean   | 2.05 <sup>c</sup>   | 7.80 <sup>bc</sup>   | 13.48 <sup>ab</sup>  | 12.65 <sup>ab</sup>  | 17.43 <sup>a</sup>  |         |
|                        | CV (%) | 69.76               | 64.62                | 56.16                | 65.69                | 49.57               |         |
| TPC<br>(μg·GAE/mg·DE)  | Range  | 49.73–51.69         | 35.93–147.13         | 21.95–126.28         | 37.64–124.87         | 38.43–143.30        | •       |
|                        | Mean   | 50.85 <sup>b</sup>  | 62.44 <sup>ab</sup>  | 71.4 <sup>ab</sup>   | 75.85 <sup>a</sup>   | 78.67 <sup>a</sup>  |         |
|                        | CV (%) | 1.99                | 50.54                | 34.43                | 31.71                | 29.16               |         |
| ABTS<br>(μg·TE/mg·DE)  | Range  | 56.55–100.20        | 38.38–226.36         | 28.53–253.44         | 23.59–250.99         | 92.45–304.38        | ***     |
|                        | Mean   | 81.5 <sup>c</sup>   | 94.05 <sup>bc</sup>  | 134.29 <sup>b</sup>  | 119.99 <sup>bc</sup> | 175.35 <sup>a</sup> |         |
|                        | CV (%) | 27.58               | 54.31                | 35.42                | 35.71                | 25.14               |         |
| DPPH<br>(μg·AAE/mg·DE) | Range  | 262.31–351.15       | 193.43–513.21        | 241.28–707.58        | 222.42–567.76        | 305.36–888.29       | ***     |
|                        | Mean   | 320.82 <sup>c</sup> | 351.62 <sup>bc</sup> | 445.33 <sup>ab</sup> | 378.56 <sup>bc</sup> | 495.95 <sup>a</sup> |         |
|                        | CV (%) | 15.80               | 26.98                | 25.06                | 21.17                | 27.43               |         |

TO, total oil; PA, palmitic acid; SA, stearic acid; OA, oleic acid; LA, linoleic acid; LNA, linolenic acid; TSFA, total saturated fatty acid; TUFA, total unsaturated fatty acid; US, the ratio of TUFA to TSFA; CS, *N*-(*p*-coumaroyl) serotonin; FS, *N*-feruloylserotonin; TPC, total phenolic content; ABTS, ABTS radical scavenging activity; DPPH: DPPH radical scavenging activity. Values in the same row marked with different superscript letters are significantly different ( $p < 0.05$ ). NS, •, \*, \*\*, \*\*\* represent no significant or significant at  $p < 0.1$ , 0.05, 0.01, 0.001, respectively.

**Table S2.** Principal component analysis of total oil content, fatty acid profile, phytochemical contents, and antioxidant activities of 197 safflower accessions, with eigenvalues and individual and cumulative contributions of variables in the first five principal components.

| Variable        | PC1   | PC2   | PC3   | PC4   | PC5   |
|-----------------|-------|-------|-------|-------|-------|
| TO              | 4.74  | 0.05  | 8.28  | 0.30  | 20.31 |
| PA              | 12.18 | 0.42  | 0.04  | 9.56  | 5.98  |
| SA              | 2.07  | 10.46 | 15.58 | 9.94  | 11.24 |
| OA              | 4.78  | 1.13  | 28.95 | 18.61 | 0.73  |
| LA              | 9.08  | 2.44  | 16.76 | 11.13 | 0.66  |
| LNA             | 4.64  | 1.54  | 6.08  | 30.89 | 0.04  |
| TSFA            | 13.76 | 5.41  | 4.04  | 0.69  | 0.03  |
| TUFA            | 13.75 | 5.18  | 4.15  | 0.92  | 0.07  |
| US              | 13.53 | 5.60  | 4.19  | 0.63  | 0.13  |
| CS              | 4.63  | 17.38 | 5.18  | 6.87  | 0.00  |
| FS              | 4.04  | 16.89 | 5.17  | 8.62  | 0.06  |
| TPC             | 2.04  | 3.77  | 0.70  | 0.62  | 47.73 |
| ABTS            | 6.71  | 12.65 | 0.88  | 0.19  | 1.71  |
| DPPH            | 4.05  | 17.09 | 0.00  | 1.02  | 11.31 |
| Eigenvalue      | 5.74  | 2.54  | 1.45  | 1.33  | 0.96  |
| Variability (%) | 41.01 | 18.17 | 10.37 | 9.53  | 6.86  |
| Cumulative (%)  | 41.01 | 59.19 | 69.55 | 79.08 | 85.94 |

TO, total oil; PA, palmitic acid; SA, stearic acid; OA, oleic acid; LA, linoleic acid; LNA, linolenic acid; TSFA, total saturated fatty acid; TUFA, total unsaturated fatty acid; US, the ratio of TUFA to TSFA; CS, *N*-(*p*-coumaroyl) serotonin; FS, *N*-feruloylserotonin; TPC, total phenolic content; ABTS, ABTS radical scavenging activity; DPPH: DPPH radical scavenging activity.

**Table S3.** Average cluster values of total oil content, fatty acid profile, phytochemical contents, and antioxidant activities of 197 safflower accessions.

| Cluster         | No. Acc.                  | TO (%)                    | PA (%)                    | SA (%)                    | OA (%)                     | LA (%)                      | LNA (%)                      | TSFA (%)                 |
|-----------------|---------------------------|---------------------------|---------------------------|---------------------------|----------------------------|-----------------------------|------------------------------|--------------------------|
| I               | 55                        | 17.47 ± 3.10 <sup>b</sup> | 6.88 ± 0.46 <sup>a</sup>  | 2.73 ± 0.44 <sup>a</sup>  | 13.40 ± 2.33 <sup>a</sup>  | 76.87 ± 2.29 <sup>b</sup>   | 0.13 ± 0.03 <sup>a</sup>     | 9.61 ± 0.41 <sup>a</sup> |
| II              | 73                        | 21.33 ± 4.45 <sup>a</sup> | 6.07 ± 0.35 <sup>b</sup>  | 2.49 ± 0.28 <sup>b</sup>  | 11.63 ± 1.62 <sup>b</sup>  | 79.73 ± 1.63 <sup>a</sup>   | 0.10 ± 0.04 <sup>b</sup>     | 8.56 ± 0.39 <sup>b</sup> |
| III             | 69                        | 22.14 ± 3.65 <sup>a</sup> | 5.96 ± 0.32 <sup>b</sup>  | 2.55 ± 0.33 <sup>b</sup>  | 11.33 ± 1.18 <sup>b</sup>  | 80.10 ± 1.38 <sup>a</sup>   | 0.08 ± 0.04 <sup>b</sup>     | 8.50 ± 0.49 <sup>b</sup> |
| <i>P</i> -value |                           | ***                       | ***                       | **                        | ***                        | ***                         | ***                          | ***                      |
|                 | TUFA (%)                  | US                        | CS (mg/g)                 | FS (mg/g)                 | TPC<br>(µg·GAE/mg·DE)      | ABTS<br>(µg·TE/mg·DE)       | DPPH<br>(µg·AAE/mg·DE)       |                          |
| I               | 90.40 ± 0.42 <sup>b</sup> | 9.42 ± 0.44 <sup>b</sup>  | 11.11 ± 6.87 <sup>b</sup> | 10.14 ± 6.34 <sup>b</sup> | 64.77 ± 25.26 <sup>b</sup> | 101.21 ± 38.89 <sup>c</sup> | 386.58 ± 92.00 <sup>b</sup>  |                          |
| II              | 91.45 ± 0.40 <sup>a</sup> | 10.71 ± 0.56 <sup>a</sup> | 9.49 ± 5.64 <sup>b</sup>  | 8.67 ± 4.50 <sup>b</sup>  | 66.35 ± 22.57 <sup>b</sup> | 117.39 ± 35.93 <sup>b</sup> | 365.76 ± 69.50 <sup>b</sup>  |                          |
| III             | 91.51 ± 0.49 <sup>a</sup> | 10.80 ± 0.70 <sup>a</sup> | 26.32 ± 9.22 <sup>a</sup> | 21.19 ± 6.88 <sup>a</sup> | 86.47 ± 21.32 <sup>a</sup> | 181.36 ± 39.86 <sup>a</sup> | 532.83 ± 108.43 <sup>a</sup> |                          |
| <i>P</i> -value | ***                       | ***                       | ***                       | ***                       | ***                        | ***                         | ***                          |                          |

TO, total oil; PA, palmitic acid; SA, stearic acid; OA, oleic acid; LA, linoleic acid; LNA, linolenic acid; TSFA, total saturated fatty acid; TUFA, total unsaturated fatty acid; US, the ratio of TUFA to TSFA; CS, *N*-(*p*-coumaroyl) serotonin; FS, *N*-feruloylserotonin; TPC, total phenolic content; ABTS, ABTS radical scavenging activity; DPPH: DPPH radical scavenging activity. Values in the same row marked with different superscript letters are significantly different ( $p < 0.05$ ). \*\*, \*\*\* represent no significant or significant at  $p < 0.01$ ,  $0.001$ , respectively.

**Table S4.** Safflower genotypes used in this study.

| No | Accession | No | Accession | No  | Accession | No  | Accession | No  | Accession |
|----|-----------|----|-----------|-----|-----------|-----|-----------|-----|-----------|
| 1  | IT333504  | 41 | K185024   | 81  | IT333472  | 121 | IT333482  | 161 | IT183710  |
| 2  | K185768   | 42 | IT333508  | 82  | IT333486  | 122 | IT333480  | 162 | IT209543  |
| 3  | K186709   | 43 | K229389   | 83  | K185025   | 123 | IT333464  | 163 | IT209509  |
| 4  | K185765   | 44 | K186563   | 84  | IT333454  | 124 | IT333460  | 164 | IT202728  |
| 5  | IT333456  | 45 | K185227   | 85  | K186562   | 125 | IT333449  | 165 | IT209523  |
| 6  | K185113   | 46 | K186730   | 86  | K186564   | 126 | IT333478  | 166 | IT183707  |
| 7  | IT333495  | 47 | K229387   | 87  | IT333473  | 127 | IT333497  | 167 | IT183706  |
| 8  | IT333500  | 48 | K185100   | 88  | K185390   | 128 | IT333485  | 168 | 909227    |
| 9  | IT333475  | 49 | K131657   | 89  | K185418   | 129 | K184502   | 169 | 909228    |
| 10 | K185962   | 50 | K185305   | 90  | K185101   | 130 | K184929   | 170 | K184528   |
| 11 | K229393   | 51 | K185303   | 91  | IT333489  | 131 | IT333447  | 171 | K131659   |
| 12 | K185129   | 52 | K185021   | 92  | K131660   | 132 | IT333448  | 172 | K019148   |
| 13 | K185719   | 53 | K185772   | 93  | IT333476  | 133 | IT333450  | 173 | K131656   |
| 14 | K185109   | 54 | K185054   | 94  | K185103   | 134 | K185222   | 174 | IT333445  |
| 15 | IT333490  | 55 | IT333488  | 95  | K185415   | 135 | K185026   | 175 | K184472   |
| 16 | K185307   | 56 | K185012   | 96  | IT333474  | 136 | IT333501  | 176 | K184530   |
| 17 | K185308   | 57 | K185014   | 97  | IT333458  | 137 | K186565   | 177 | K184536   |
| 18 | K186514   | 58 | K185230   | 98  | K185803   | 138 | K184505   | 178 | K184529   |
| 19 | IT333468  | 59 | IT333511  | 99  | K185106   | 139 | K185782   | 179 | K184535   |
| 20 | IT333494  | 60 | K185112   | 100 | K229396   | 140 | K185386   | 180 | K184531   |
| 21 | IT333505  | 61 | K184983   | 101 | K185770   | 141 | IT333484  | 181 | IT333459  |
| 22 | K185228   | 62 | K185142   | 102 | K261449   | 142 | K131662   | 182 | K184524   |
| 23 | IT333513  | 63 | IT333492  | 103 | IT333479  | 143 | K171322   | 183 | K014611   |
| 24 | IT333506  | 64 | IT333512  | 104 | IT333446  | 144 | IT333496  | 184 | K184533   |
| 25 | IT333467  | 65 | IT333453  | 105 | IT333457  | 145 | K184480   | 185 | K184520   |
| 26 | IT333465  | 66 | IT333455  | 106 | K184931   | 146 | K175278   | 186 | K131653   |
| 27 | K185414   | 67 | K185229   | 107 | K185016   | 147 | K185017   | 187 | K184478   |
| 28 | IT333469  | 68 | K186365   | 108 | K185013   | 148 | K185785   | 188 | K184523   |
| 29 | IT333498  | 69 | IT333509  | 109 | K185417   | 149 | K186732   | 189 | K184521   |
| 30 | IT333481  | 70 | K185771   | 110 | IT333477  | 150 | K185309   | 190 | K184534   |
| 31 | IT333503  | 71 | K185311   | 111 | IT333444  | 151 | K185961   | 191 | K184525   |
| 32 | IT333487  | 72 | IT333499  | 112 | K171354   | 152 | K185028   | 192 | IT333491  |
| 33 | K185058   | 73 | IT333451  | 113 | IT333452  | 153 | K185784   | 193 | K184526   |
| 34 | K131655   | 74 | K185015   | 114 | K184966   | 154 | K185099   | 194 | K184527   |
| 35 | K186729   | 75 | IT333493  | 115 | K184923   | 155 | K185022   | 195 | K171325   |
| 36 | IT333462  | 76 | K185107   | 116 | K184922   | 156 | K185104   | 196 | K184484   |
| 37 | IT333470  | 77 | K185781   | 117 | IT333510  | 157 | K185224   | 197 | K184477   |
| 38 | IT333466  | 78 | IT333471  | 118 | IT333502  | 158 | K185135   |     |           |
| 39 | IT333463  | 79 | IT333461  | 119 | K185046   | 159 | K185232   |     |           |
| 40 | K186728   | 80 | K184965   | 120 | K229394   | 160 | IT209562  |     |           |

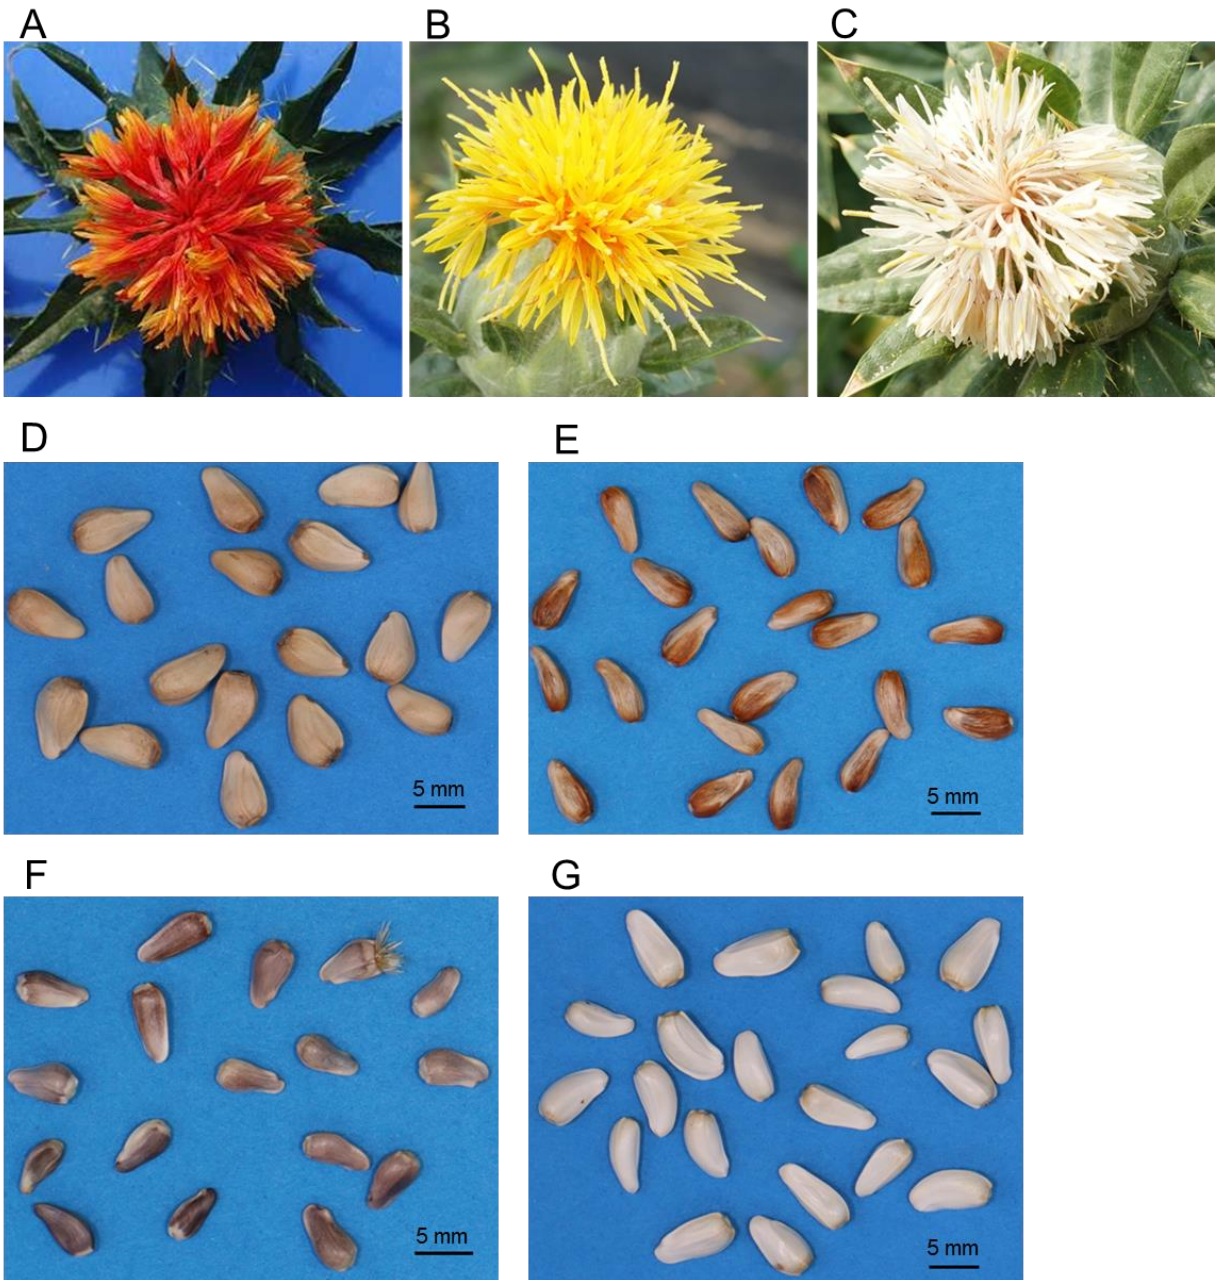

**Figure S1.** Flower and seed samples of safflower of different flower and seed coat colors. A: Red flower; B: Yellow flower; C: White flower; D: Light brown seed; E: Brown seed; F: Dark brown seed; G: White seed.

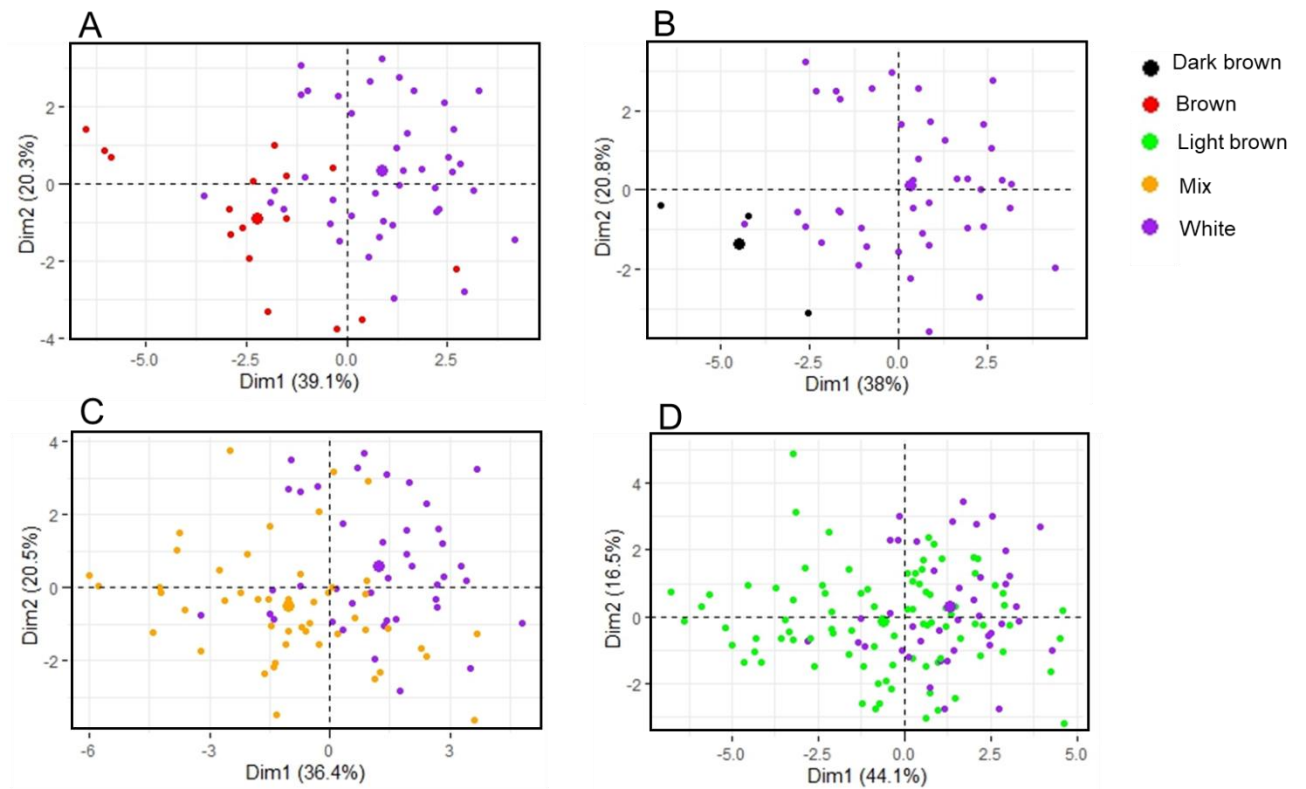

**Figure S2.** Principal component biplots of the total oil content, fatty acid profile, phytochemical contents, and antioxidant activities of the different seed coat color groups. (A) Loading plots of genotypes with white and brown seed coat colors; (B) Loading plots of genotypes with white and dark brown seed coat colors; (C) Loading plots of genotypes with white and mix seed coat colors; (D) Loading plots of genotypes with white and light brown seed coat colors.
